# Supplementary figures and images for: Comparative Genomic Analysis of Bifidobacterium bifidum Strains Isolated from Different Niches
Source: MDPI journal article supplement (doi:10.3390/genes12101504), 2021-09-25

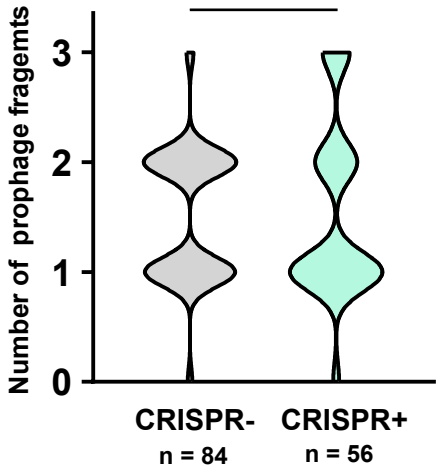

Supplement: s1 [file s1]

**A**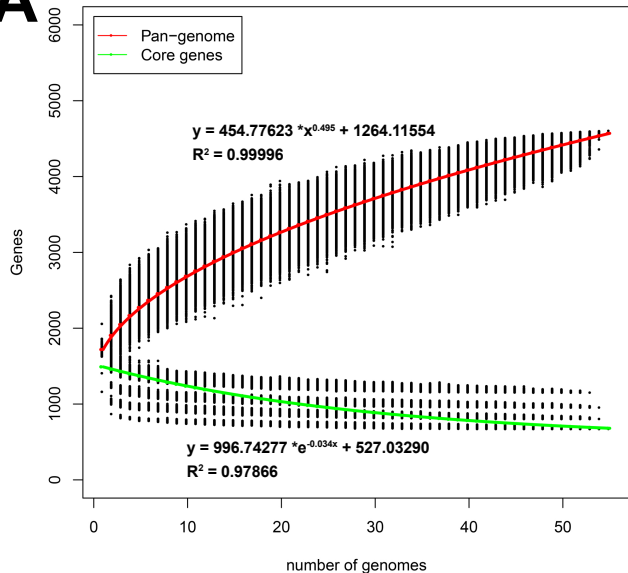**B**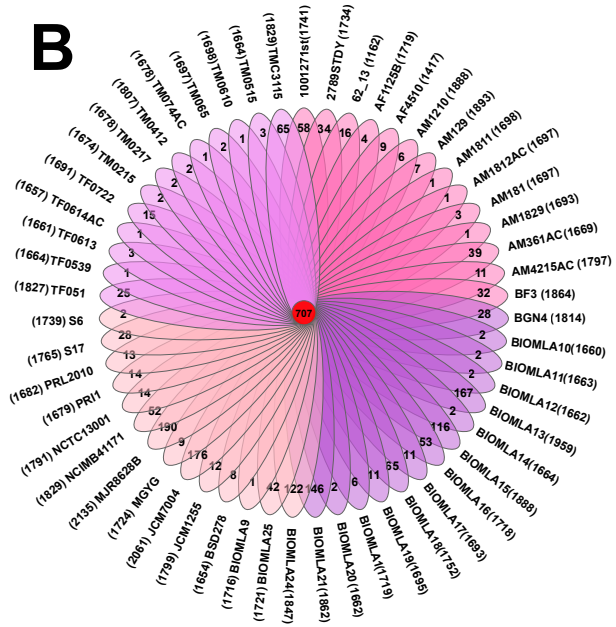

Supplement: s1 [file s1]

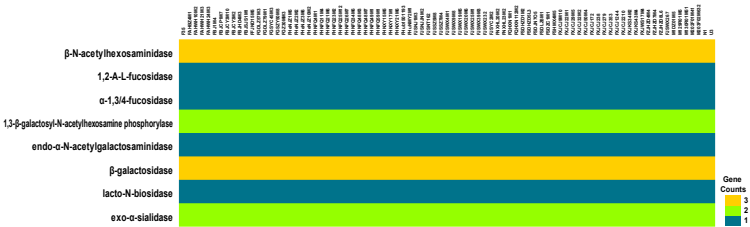

Supplement: s1 [file s1]
